# Supplementary material for: The first Miocene fossils from coastal woodlands in the southern East African Rift
Source: PubMed Central journal article supplement (PMC10494320; doi:10.1016/j.isci.2023.107644), 2023-08-15
Supplement: mmc1.pdf [file mmc1.pdf]

## **Supplemental information**

### **The first Miocene fossils from coastal woodlands in the southern East African Rift**

**René Bobe, Vera Aldeias, Zeresenay Alemseged, Robert L. Anemone, Will Archer, Georges Aumaître, Marion K. Bamford, Dora Biro, Didier L. Bournès, Melissa Doyle Boyd, David R. Braun, Cristian Capelli, João d'Oliveira Coelho, Jörg M. Habermann, Jason J. Head, Karim Keddadouche, Kornelius Kupczik, Anne-Elisabeth Lebatard, Tina Lüdecke, Amélia Macôa, Felipe I. Martínez, Jacinto Mathe, Clara Mendes, Luis Meira Paulo, Maria Pinto, Darya Presnyakova, Thomas A. Püschel, Frederico Tátá Regala, Mark Sier, Maria Joana Ferreira da Silva, Marc Stalmans, and Susana Carvalho**

Supplemental Information

Contents of this file  
Figure S1  
Tables S1 to S9

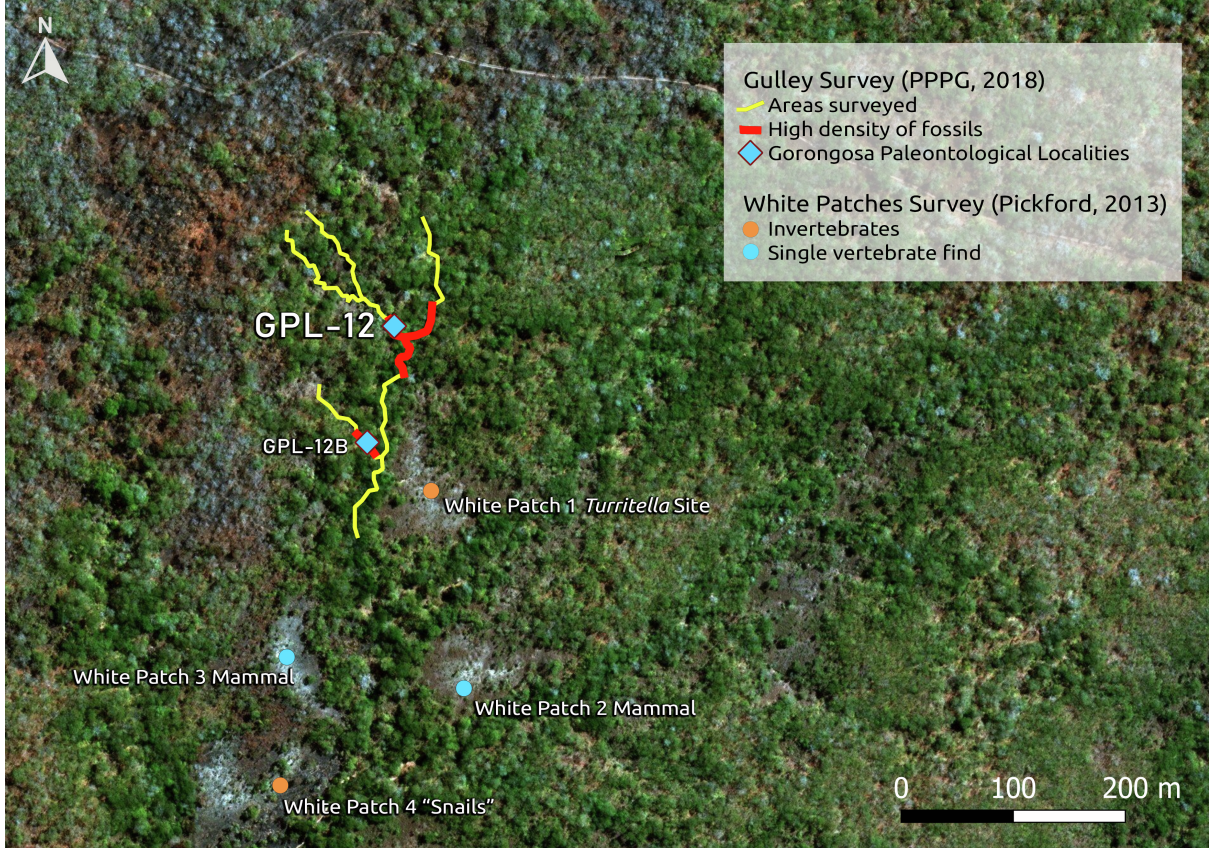

**Figure S1.** Map of the extent of GPL-12, and surrounding areas, related to Paleontological excavations (Methods Details).

**Table S1.** Sampling details for rock samples from the lower member of the Mazamba Formation (F=Fossil) and modern (M) sediment samples taken for atmospheric <sup>10</sup>Be dating.

| Sample ID          | Sample type | Locality/site                 | Decimal degree |         | Lithology                                   | Sedimentary environment                                    | Sampling depth below surface                 |
|--------------------|-------------|-------------------------------|----------------|---------|---------------------------------------------|------------------------------------------------------------|----------------------------------------------|
|                    |             |                               | °S             | °E      |                                             |                                                            |                                              |
| Be18-Gor-GPL1NE-1  | F           | GPL1NE_section base           | -18.9288       | 34.6476 | coarse carbonate-cemented sandstone         | fluvial, alluvial channel                                  | excavated trench wall                        |
| Be18-Gor-GPL1NE-2  | F           | GPL1NE                        | -18.9288       | 34.6476 | sandstone                                   | fluvio-deltaic estuarine, central                          | excavated trench wall                        |
| Be18-Gor-GPL1NE-3  | F           | GPL1NE                        | -18.9288       | 34.6476 | sandy claystone                             | basin/swamp                                                | excavated trench wall                        |
| Be18-Gor-GPL1NE-4  | F           | GPL1NE                        | -18.9288       | 34.6476 | clayey sandstone                            | fluvio-deltaic, distributary channel                       | excavated trench wall                        |
| Be18-Gor-GPL1NE-5  | F           | GPL1NE                        | -18.9288       | 34.6476 | sandy claystone                             | basin/swamp                                                | excavated trench wall                        |
| Be18-Gor-GPL1NE-6  | F           | GPL1NE_section top            | -18.9288       | 34.6476 | sandy clay- to marlstone                    | estuarine, central basin                                   | excavated trench wall                        |
| Be18-Gor-GPL12-0.1 | F           | GPL12, STP101_section base    | -18.9337       | 34.6456 | coarse carbonate-cemented sandstone         | fluvial, alluvial channel                                  | excavated trench wall                        |
| Be18-Gor-GPL12-1.1 | F           | GPL12, STP101                 | -18.9337       | 34.6456 | coarse carbonate-cemented reddish sandstone | fluvio-deltaic estuarine, central                          | excavated trench wall                        |
| Be18-Gor-GPL12-3.1 | F           | GPL12, STP101                 | -18.9337       | 34.6456 | brown-beige sandy claystone                 | basin/swamp                                                | excavated trench wall                        |
| Be18-Gor-GPL12-4.1 | F           | GPL12, STP101                 | -18.9337       | 34.6456 | brown-beige clayey sandstone                | fluvio-deltaic, distributary channel                       | excavated trench wall                        |
| Be18-Gor-GPL12-5.1 | F           | GPL12, STP101_section top     | -18.9337       | 34.6456 | olive-green claystone                       | estuarine, central basin                                   | excavated trench wall                        |
| 17-Gor-GPL6-8      | F           | GPL6 section base             | -18.9271       | 34.6530 | clayey sandstone                            | estuarine, central basin/swamp                             | excavated section wall                       |
| 17-Gor-GPL6-3      | F           | GPL6 section center           | -18.9271       | 34.6530 | laminated claystone                         | estuarine, central basin/swamp                             | excavated section wall                       |
| 17-Gor-GPL2-5      | F           | GPL2 section base             | -18.9070       | 34.6757 | clayey olive-brown sandstone                | estuarine/marine, lagoonal shelf/barrier                   | excavated section wall                       |
| 17-Gor-GPL2-10     | F           | GPL2 section top              | -18.9070       | 34.6757 | olive clayey sandstone                      | estuarine/marine, lagoonal shelf/barrier                   | excavated section wall                       |
| Be18-Gor-Pu-2      | M           | Pungwe River                  | -18.9944       | 34.3494 | sandy clay                                  | fluvial, alluvial floodplain c. 200 m north of river       | 60 cm, ca. 2-3 m above water level           |
| Be18-Gor-Urem-1.1  | M           | Urema River                   | -18.9878       | 34.5693 | dark-brown sandy                            | fluvial, riverbank                                         | 30 cm, at water level                        |
| Be18-Gor-Vun-1.1   | M           | Vunduzi River (?)             | -18.4805       | 34.2103 | muddy coarse sand                           | fluvial, riverbank                                         | water-sediment interface at 1 cm water depth |
| Be18-Gor-VunS1-1.1 | M           | Stream S of Vunduzi River     | -18.4899       | 34.2011 | sandy mud                                   | fluvial, riverbank                                         | water-sediment interface at 1 cm water depth |
| Be18-Gor-Muc-1.1   | M           | Mucuro Mazi River             | -18.5187       | 34.1915 | muddy sand                                  | fluvial, riverbank                                         | water-sediment interface at 1 cm water depth |
| Be18-Gor-LUrem-1.1 | M           | Lake Urema                    | -18.9130       | 34.5178 | muddy sand                                  | fluvio-lacustrine, fluvio-deltaic, river-dominated estuary | 30 cm, at water level                        |
| Be18-Bei-EstRi1-1  | M           | 1st estuary NE Beira          | -19.7873       | 34.9609 | muddy sand                                  | shore lagoonal estuary                                     | 20 cm, ca. 1 cm above water level            |
| Be18-Bei-SavEst-1  | M           | Savane River estuary NE Beira | -19.6806       | 35.1396 | organic-rich sandy mud/clay                 | on mangrove-dominated barrier peninsula                    | surface at water level                       |
| Be18-Bei-SavFor-1  | M           | Savane River estuary NE Beira | -19.6821       | 35.1399 | organic-rich sandy mud/clay                 | mangrove forest/swamp on lagoonal barrier peninsula        | 20 cm, ca. 0.5 m above water level           |

**Table S2.** Concentrations of  $^{10}\text{Be}$  and  $^9\text{Be}$  and  $^{10}\text{Be}/^9\text{Be}$  ratios for the Gorongosa samples, related to atmospheric  $^{10}\text{Be}$  dating.

|                         | Samples                | Sample weight<br>[g] | Measured ( $^{10}\text{Be}/^9\text{Be}$ )<br>* $10^{-13}$ | Authigenic $^9\text{Be}$<br>* $10^{16}$ [at.g $^{-1}$ ] | Authigenic $^{10}\text{Be}$<br>* $10^7$ [at.g $^{-1}$ ] | Authigenic $^{10}\text{Be}/^9\text{Be}$<br>* $10^{-8}$ |
|-------------------------|------------------------|----------------------|-----------------------------------------------------------|---------------------------------------------------------|---------------------------------------------------------|--------------------------------------------------------|
| Modern                  | Be18-Gor-Pu-2          | 0,9593               | 106,6344 ± 2,1964                                         | 5,1161 ± 0,1496                                         | 22,6219 ± 0,4653                                        | 4,4217 ± 0,3162                                        |
|                         | Be18-Gor-Urem-1.1      | 0,9584               | 89,1654 ± 1,9579                                          | 7,9130 ± 0,2405                                         | 18,9476 ± 0,4153                                        | 2,3945 ± 0,1795                                        |
|                         | Be18-Gor-Vun-1.1       | 0,9596               | 15,8407 ± 0,4884                                          | 1,6814 ± 0,0095                                         | 3,3464 ± 0,1021                                         | 1,9902 ± 0,1235                                        |
|                         | Be18-Gor-VunS1-1.1     | 0,9574               | 86,4330 ± 1,8054                                          | 7,5941 ± 0,0724                                         | 18,3644 ± 0,3829                                        | 2,4182 ± 0,1109                                        |
|                         | Be18-Gor-Muc-1.1       | 0,9585               | 84,7570 ± 2,1050                                          | 2,6621 ± 0,1283                                         | 17,9818 ± 0,4458                                        | 6,7548 ± 0,7323                                        |
|                         | Be18-Gor-Lurem-1.1     | 0,9624               | 70,8797 ± 1,7002                                          | 3,3840 ± 0,1200                                         | 14,9327 ± 0,3574                                        | 4,4127 ± 0,3776                                        |
|                         | Be18-Bei-EstRi1-1      | 0,9585               | 280,9860 ± 5,0466                                         | 4,2827 ± 0,0239                                         | 59,3875 ± 1,0660                                        | 13,8668 ± 0,5213                                       |
|                         | Be18-Bei-SavEst-1      | 0,9583               | 77,6644 ± 1,8204                                          | 2,3125 ± 0,0795                                         | 16,4663 ± 0,3852                                        | 7,1206 ± 0,5920                                        |
|                         | Be18-Bei-SavFor-1      | 0,9583               | 75,6599 ± 1,9046                                          | 2,6573 ± 0,0655                                         | 16,0133 ± 0,4023                                        | 6,0262 ± 0,4240                                        |
| Lower Mazamba Formation | Be18-Gor-GPL1NE-1 (2)  | 0,9162               | 1,7757 ± 0,0005                                           | 0,0137 ± 0,0569                                         | 0,5941 ± 0,0186                                         | 0,1894 ± 0,0137                                        |
|                         | Be18-Gor-GPL1NE-2      | 0,9174               | 0,1918 ± 0,0008                                           | 0,0011 ± 0,1369                                         | 0,0610 ± 0,0032                                         | 0,0096 ± 0,0011                                        |
|                         | Be18-Gor-GPL1NE-3      | 0,9137               | 1,2693 ± 0,0005                                           | 0,0054 ± 0,1006                                         | 0,4189 ± 0,0137                                         | 0,0728 ± 0,0054                                        |
|                         | Be18-Gor-GPL1NE-4 (2)  | 0,9158               | 0,0383 ± 0,0018                                           | 0,0011 ± 0,0457                                         | 0,0125 ± 0,0015                                         | 0,0045 ± 0,0011                                        |
|                         | Be18-Gor-GPL1NE-5      | 0,9172               | 0,0082 ± 0,0024                                           | 0,0003 ± 0,0490                                         | 0,0027 ± 0,0005                                         | 0,0009 ± 0,0003                                        |
|                         | Be18-Gor-GPL1NE-6 (2)  | 0,9151               | 2,6210 ± 0,0004                                           | 0,0196 ± 0,1535                                         | 0,8776 ± 0,0272                                         | 0,2065 ± 0,0196                                        |
|                         | 17-Gor-GPL2-5          | 0,9167               | 1,5327 ± 0,0005                                           | 0,0048 ± 0,0700                                         | 0,5178 ± 0,0162                                         | 0,0734 ± 0,0048                                        |
|                         | 17-Gor-GPL2-10 (2)     | 0,9174               | 1,9923 ± 0,0006                                           | 5,0197 ± 0,1192                                         | 0,6586 ± 0,0203                                         | 0,1312 ± 0,0102                                        |
|                         | 17-Gor-GPL6-3          | 0,9173               | 0,4146 ± 0,0006                                           | 0,0023 ± 0,0873                                         | 0,1396 ± 0,0056                                         | 0,0269 ± 0,0023                                        |
|                         | 17-Gor-GPL6-8          | 0,9192               | 0,1950 ± 0,0009                                           | 0,0040 ± 0,0568                                         | 0,0653 ± 0,0041                                         | 0,0296 ± 0,0040                                        |
|                         | Be18-Gor-GPL12-0.1 (2) | 0,9174               | 0,0464 ± 0,0015                                           | 0,0006 ± 0,1541                                         | 0,0156 ± 0,0016                                         | 0,0027 ± 0,0006                                        |
|                         | Be18-Gor-GPL12-1.1     | 0,9174               | 0,0103 ± 0,0030                                           | 0,0003 ± 0,0754                                         | 0,0035 ± 0,0007                                         | 0,0008 ± 0,0003                                        |
|                         | Be18-Gor-GPL12-3.1 (2) | 0,9175               | 0,4907 ± 0,0006                                           | 0,0025 ± 0,0883                                         | 0,1649 ± 0,0071                                         | 0,0277 ± 0,0025                                        |
|                         | Be18-Gor-GPL12-4.1     | 0,9191               | 0,0423 ± 0,0019                                           | 0,0008 ± 0,1172                                         | 0,0141 ± 0,0019                                         | 0,0030 ± 0,0008                                        |
|                         | Be18-Gor-GPL12-5.1 (2) | 0,9168               | 0,1879 ± 0,0009                                           | 0,0011 ± 0,0901                                         | 0,0630 ± 0,0037                                         | 0,0089 ± 0,0011                                        |

**Table S3.** Results of  $^{26}\text{Al}/^{10}\text{Be}$  analyses, related to cosmogenic nuclide dating.

| Sample        | Depth (cm) | Depth (g.cm <sup>-2</sup> ) | Dissolved quartz (g) | <sup>9</sup> Be carrier (10 <sup>19</sup> at.) | <sup>10</sup> Be (10 <sup>5</sup> at.g <sup>-1</sup> ) | <sup>26</sup> Al (10 <sup>5</sup> at.g <sup>-1</sup> ) | <sup>26</sup> Al/ <sup>10</sup> Be |
|---------------|------------|-----------------------------|----------------------|------------------------------------------------|--------------------------------------------------------|--------------------------------------------------------|------------------------------------|
| 16-Gor-Muss-7 | 1500       | 3750                        | 20,1345              | 3,0244                                         | 9909,71 ± 1328,88                                      | 37881,44 ± 14645,17                                    | 3,8227 ± 1,5642                    |
| 16-Gor-Muss-8 | 1050       | 2625                        | 20,1432              | 3,0511                                         | 11973,11 ± 1589,53                                     | 57683,13 ± 13054,15                                    | 4,8177 ± 1,2640                    |

**Table S4.** Model outputs of burial durations and denudation rates, related to cosmogenic nuclide dating.

| Sample        | Model Without Post-B production               |                             | Denud.<br>before B.<br>(m.Ma <sup>-1</sup> ) | Model With Post-B. production |                                          |                                  |                                  |
|---------------|-----------------------------------------------|-----------------------------|----------------------------------------------|-------------------------------|------------------------------------------|----------------------------------|----------------------------------|
|               | Denud. before<br>burial (m.Ma <sup>-1</sup> ) | Min Burial duration<br>(ka) |                                              | Max Burial duration<br>(ka)   | Denud. after<br>B. (m.Ma <sup>-1</sup> ) | % [ <sup>10</sup> Be]<br>Post-B. | % [ <sup>26</sup> Al]<br>Post-B. |
| 16-Gor-Muss-7 | 140,04                                        | 1 316,25 ± 539,66           | 1 054,85                                     | 971,99 ± 398,52               | 20,93                                    | 84                               | 81                               |
| 16-Gor-Muss-8 | 147,30                                        | 838,16 ± 220,96             | 1 746,90                                     | 971,99 ± 256,24               | 20,93                                    | 92                               | 92                               |

**Table S5.** List of fossil shark specimens used in the analysis of tooth outlines (n = 598), related to Figure 9. Cappetta 1970 refers to [1].

| Specimen Number | n Source/Museum                                | Locality             | Epoch          | Species                          | Reference                            |
|-----------------|------------------------------------------------|----------------------|----------------|----------------------------------|--------------------------------------|
| MPEG-1131-V     | 1 Aguilera et al. 2017                         | Brazil               | Early Miocene  | † <i>Carcharhinus ackermanni</i> | doi:10.1371/journal.pone.0182740     |
| AMU-CURS-990    | 1 Carrillo-Briceño et al. 2016                 | Venezuela            | Early Miocene  | † <i>Carcharhinus brachyurus</i> | doi:10.5167/uzh-125933               |
| MUN-STRI-43808  | 1 Carrillo-Briceño et al. 2019                 | Colombia             | Middle Miocene | † <i>Carcharhinus gibbesii</i>   | doi:10.5194/bg-16-33-2019            |
| MPEG-1836-V     | 1 Aguilera et al. 2017                         | Brazil               | Early Miocene  | † <i>Carcharhinus perezii</i>    | doi:10.1371/journal.pone.0182740     |
| UAP-14.181-14   | 1 Andrianavalona et al. 2015                   | NW Madagascar        | Miocene        | † <i>Carcharhinus priscus</i>    | doi:10.1371/journal.pone.0129444     |
| UAP-13.159      | 1 Andrianavalona et al. 2015                   | NW Madagascar        | Miocene        | † <i>Carcharhinus</i> sp.        | doi:10.1371/journal.pone.0129444     |
| AMU-CURS-647    | 1 Carrillo-Briceño et al. 2016                 | Venezuela            | Early Miocene  | † <i>Galeocerdo aduncus</i>      | doi:10.5167/uzh-125933               |
| AMU-CURS-730    | 1 Carrillo-Briceño et al. 2016                 | Venezuela            | Early Miocene  | † <i>Galeocerdo aduncus</i>      | doi:10.5167/uzh-125933               |
| LPN 162         | 1 Capetta, 1970                                | France (Montpellier) | Miocene        | † <i>Galeocerdo aduncus</i>      | Cappetta 1970                        |
| LPN 163         | 1 Capetta, 1970                                | France (Montpellier) | Miocene        | † <i>Galeocerdo aduncus</i>      | Cappetta 1970                        |
| MUSM 3262       | 2 Landini et al. 2017                          | Peru                 | Late Miocene   | † <i>Galeocerdo aduncus</i>      | doi:10.1016/j.jsames.2016.12.010     |
| NA              | 1 Pawellek et al. 2012                         | Libya                | Early Pliocene | <i>Galeocerdo cuvier</i>         | doi:10.1127/0077-7749/2012/0272      |
| 105Z100         | 1 Argyriou et al. 2015                         | Libya                | Early Miocene  | † <i>Galeocerdo mayumbensis</i>  | doi:10.1016/j.jafrearsci.2014.11.008 |
| 112Z100         | 1 Argyriou et al. 2015                         | Libya                | Early Miocene  | † <i>Galeocerdo mayumbensis</i>  | doi:10.1016/j.jafrearsci.2014.11.008 |
| AMU-CURS-646    | 1 Carrillo-Briceño et al. 2016                 | Venezuela            | Early Miocene  | † <i>Galeocerdo mayumbensis</i>  | doi:10.5167/uzh-125933               |
| AMU-CURS-995    | 1 Carrillo-Briceño et al. 2016                 | Venezuela            | Early Miocene  | † <i>Galeocerdo mayumbensis</i>  | doi:10.5167/uzh-125933               |
| MPEG-1710-V     | 1 Aguilera et al. 2017                         | Brazil               | Early Miocene  | † <i>Galeocerdo mayumbensis</i>  | doi:10.1371/journal.pone.0182740     |
| MPEG-177-V      | 1 Aguilera et al. 2017                         | Brazil               | Early Miocene  | † <i>Galeocerdo mayumbensis</i>  | doi:10.1371/journal.pone.0182740     |
| MPEG-1854-V     | 1 Aguilera et al. 2017                         | Brazil               | Early Miocene  | † <i>Galeocerdo mayumbensis</i>  | doi:10.1371/journal.pone.0182740     |
| UAP-13.167      | 1 Andrianavalona et al. 2015                   | NW Madagascar        | Miocene        | † <i>Galeocerdo mayumbensis</i>  | doi:10.1371/journal.pone.0129444     |
| UAP-13.172      | 1 Andrianavalona et al. 2015                   | NW Madagascar        | Miocene        | † <i>Galeocerdo mayumbensis</i>  | doi:10.1371/journal.pone.0129444     |
| MPEG-781-V      | 1 Aguilera et al. 2017                         | Brazil               | Early Miocene  | † <i>Hemipristis serra</i>       | doi:10.1371/journal.pone.0182740     |
| MUN-STRI-34790  | 2 Carrillo-Briceño et al. 2019                 | Colombia             | Middle Miocene | † <i>Hemipristis serra</i>       | doi:10.5194/bg-16-33-2019            |
| MUN-STRI-41132  | 1 Carrillo-Briceño et al. 2019                 | Colombia             | Middle Miocene | † <i>Physogaleus contortus</i>   | doi:10.5194/bg-16-33-2019            |
| AMU-CURS-648    | 1 Carrillo-Briceño et al. 2016                 | Venezuela            | Early Miocene  | † <i>Physogaleus contortus</i>   | doi:10.5167/uzh-125933               |
| AMU-CURS-719    | 1 Carrillo-Briceño et al. 2016                 | Venezuela            | Early Miocene  | † <i>Physogaleus contortus</i>   | doi:10.5167/uzh-125933               |
| MUSM 3261       | 1 Landini et al. 2017                          | Peru                 | Late Miocene   | † <i>Physogaleus contortus</i>   | doi:10.1016/j.jsames.2016.12.010     |
| EMRG-Chond-T-76 | 59 Vertebrate Collection, University of Vienna | USA (North Carolina) | Early Miocene  | † <i>Galeocerdo aduncus</i>      | doi:10.1017/pab.2021.6               |
| NA              | 6 Haimuseum Aathal Switzerland                 | Germany              | Miocene        | † <i>Galeocerdo aduncus</i>      | doi:10.1017/pab.2021.6               |
| KM_DJ.033       | 3 Haimuseum Aathal Switzerland                 | Germany              | Oligocene      | † <i>Galeocerdo aduncus</i>      | doi:10.1017/pab.2021.6               |
| 2012/0017/0240  | 14 Natural History Museum Vienna               | USA (Florida)        | Miocene        | † <i>Galeocerdo aduncus</i>      | doi:10.1017/pab.2021.6               |
| UF 116830       | 2 Florida Museum of Natural History            | USA (Florida)        | Middle Miocene | † <i>Galeocerdo aduncus</i>      | doi:10.1017/pab.2021.6               |
| UF 217131       | 5 Florida Museum of Natural History            | USA (Florida)        | Middle Miocene | † <i>Galeocerdo aduncus</i>      | doi:10.1017/pab.2021.6               |
| UF 231021       | 1 Florida Museum of Natural History            | USA (Florida)        | Middle Miocene | † <i>Galeocerdo aduncus</i>      | doi:10.1017/pab.2021.6               |
| UF 232403       | 16 Florida Museum of Natural History           | USA (Florida)        | Middle Miocene | † <i>Galeocerdo aduncus</i>      | doi:10.1017/pab.2021.6               |
| UF 232425       | 1 Florida Museum of Natural History            | USA (Florida)        | Middle Miocene | † <i>Galeocerdo aduncus</i>      | doi:10.1017/pab.2021.6               |
| UF 234253       | 1 Florida Museum of Natural History            | USA (Florida)        | Middle Miocene | † <i>Galeocerdo aduncus</i>      | doi:10.1017/pab.2021.6               |
| UF 240484       | 7 Florida Museum of Natural History            | USA (Florida)        | Late Miocene   | † <i>Galeocerdo aduncus</i>      | doi:10.1017/pab.2021.6               |
| UF 278633       | 1 Florida Museum of Natural History            | USA (Florida)        | Middle Miocene | † <i>Galeocerdo aduncus</i>      | doi:10.1017/pab.2021.6               |
| UF 28780        | 4 Florida Museum of Natural History            | USA (Florida)        | Middle Miocene | † <i>Galeocerdo aduncus</i>      | doi:10.1017/pab.2021.6               |
| UF/TRO 15237    | 1 Florida Museum of Natural History            | USA (Florida)        | Late Miocene   | † <i>Galeocerdo aduncus</i>      | doi:10.1017/pab.2021.6               |
| 24756           | 3 NMNH, Washington, D.C.                       | USA (North Carolina) | Miocene        | † <i>Galeocerdo aduncus</i>      | doi:10.1017/pab.2021.6               |
| 287850          | 27 NMNH, Washington, D.C.                      | USA (North Carolina) | Miocene        | † <i>Galeocerdo aduncus</i>      | doi:10.1017/pab.2021.6               |
| KF-17E          | 1 Patnaik et al. 2014                          | India (Gujarat)      | Early Miocene  | † <i>Galeocerdo bigelowi</i>     | doi:10.1017/pab.2021.6               |
| NA              | 1 Lawley 1881                                  | Italy (Tuscany)      | Pliocene       | † <i>Galeocerdo capellini</i>    | doi:10.1017/pab.2021.6               |
| IGM 5854        | 1 Universidad Nacional Autónoma de México      | Mexico               | Pliocene       | † <i>Galeocerdo capellini</i>    | doi:10.1017/pab.2021.6               |
| 1281            | 25 Universidad Nacional Autónoma de México     | Mexico               | Pliocene       | † <i>Galeocerdo capellini</i>    | doi:10.1017/pab.2021.6               |
| S216(P49)       | 1 Müller 1999                                  | USA (North Carolina) | Early Miocene  | † <i>Galeocerdo casei</i>        | doi:10.1017/pab.2021.6               |

|                 |                                                |                      |                |                                |                        |
|-----------------|------------------------------------------------|----------------------|----------------|--------------------------------|------------------------|
| S217(P49)       | 1 Müller 1999                                  | USA (North Carolina) | Early Miocene  | † <i>Galeocerdo casei</i>      | doi:10.1017/pab.2021.6 |
| P.30501         | 1 Natural History Museum London                | USA (Alabama)        | Early Eocene   | † <i>Galeocerdo clarkensis</i> | doi:10.1017/pab.2021.6 |
| P.30465-7       | 1 Natural History Museum London                | USA (Alabama)        | Early Eocene   | † <i>Galeocerdo clarkensis</i> | doi:10.1017/pab.2021.6 |
| NA              | 25 Haimuseum Aathal Switzerland                | USA (South Carolina) | Late Eocene    | † <i>Galeocerdo clarkensis</i> | doi:10.1017/pab.2021.6 |
| UF 65552        | 1 Florida Museum of Natural History            | USA (Florida)        | Middle Miocene | <i>Galeocerdo cuvier</i>       | doi:10.1017/pab.2021.6 |
| NA              | 3 Haimuseum Aathal Switzerland                 | USA (Florida)        | Miocene        | <i>Galeocerdo cuvier</i>       | doi:10.1017/pab.2021.6 |
| NA              | 5 Haimuseum Aathal Switzerland                 | USA (North Carolina) | Late Miocene   | <i>Galeocerdo cuvier</i>       | doi:10.1017/pab.2021.6 |
| NA              | 2 Florida Museum of Natural History            | USA (North Carolina) | Pliocene       | <i>Galeocerdo cuvier</i>       | doi:10.1017/pab.2021.6 |
| NA              | 1 Florida Museum of Natural History            | USA (South Carolina) | Early Pliocene | <i>Galeocerdo cuvier</i>       | doi:10.1017/pab.2021.6 |
| NA              | 1 Florida Museum of Natural History            | USA (North Carolina) | Miocene        | <i>Galeocerdo cuvier</i>       | doi:10.1017/pab.2021.6 |
| EJ-XX-427       | 1 Florida Museum of Natural History            | USA (Florida)        | Miocene        | <i>Galeocerdo cuvier</i>       | doi:10.1017/pab.2021.6 |
| UF/TRO 11181    | 1 Florida Museum of Natural History            | USA (Florida)        | Early Pliocene | <i>Galeocerdo cuvier</i>       | doi:10.1017/pab.2021.6 |
| UF/TRO 15482    | 3 Florida Museum of Natural History            | USA (Florida)        | Early Pliocene | <i>Galeocerdo cuvier</i>       | doi:10.1017/pab.2021.6 |
| UF/TRO 14220    | 3 Florida Museum of Natural History            | USA (Florida)        | Early Pliocene | <i>Galeocerdo cuvier</i>       | doi:10.1017/pab.2021.6 |
| UF 17860        | 2 Florida Museum of Natural History            | USA (Florida)        | Early Pliocene | <i>Galeocerdo cuvier</i>       | doi:10.1017/pab.2021.6 |
| UF 227304       | 1 Florida Museum of Natural History            | USA (Florida)        | Early Pliocene | <i>Galeocerdo cuvier</i>       | doi:10.1017/pab.2021.6 |
| UF 227889       | 1 Florida Museum of Natural History            | USA (Florida)        | Early Pliocene | <i>Galeocerdo cuvier</i>       | doi:10.1017/pab.2021.6 |
| UF 227871       | 2 Florida Museum of Natural History            | USA (Florida)        | Early Pliocene | <i>Galeocerdo cuvier</i>       | doi:10.1017/pab.2021.6 |
| UF 228801       | 1 Florida Museum of Natural History            | USA (Florida)        | Early Pliocene | <i>Galeocerdo cuvier</i>       | doi:10.1017/pab.2021.6 |
| UF/TRO 3801     | 3 Florida Museum of Natural History            | USA (Florida)        | Early Pliocene | <i>Galeocerdo cuvier</i>       | doi:10.1017/pab.2021.6 |
| UF/TRO 3876     | 3 Florida Museum of Natural History            | USA (Florida)        | Early Pliocene | <i>Galeocerdo cuvier</i>       | doi:10.1017/pab.2021.6 |
| UF/TRO 5438     | 4 Florida Museum of Natural History            | USA (Florida)        | Early Pliocene | <i>Galeocerdo cuvier</i>       | doi:10.1017/pab.2021.6 |
| UF/TRO 5603     | 1 Florida Museum of Natural History            | USA (Florida)        | Early Pliocene | <i>Galeocerdo cuvier</i>       | doi:10.1017/pab.2021.6 |
| UF/TRO 5679     | 1 Florida Museum of Natural History            | USA (Florida)        | Early Pliocene | <i>Galeocerdo cuvier</i>       | doi:10.1017/pab.2021.6 |
| UF/TRO 5700     | 2 Florida Museum of Natural History            | USA (Florida)        | Early Pliocene | <i>Galeocerdo cuvier</i>       | doi:10.1017/pab.2021.6 |
| UF/TRO 5745     | 2 Florida Museum of Natural History            | USA (Florida)        | Early Pliocene | <i>Galeocerdo cuvier</i>       | doi:10.1017/pab.2021.6 |
| UF/TRO 8604     | 1 Florida Museum of Natural History            | USA (Florida)        | Early Pliocene | <i>Galeocerdo cuvier</i>       | doi:10.1017/pab.2021.6 |
| UF/TRO 8935     | 1 Florida Museum of Natural History            | USA (Florida)        | Early Pliocene | <i>Galeocerdo cuvier</i>       | doi:10.1017/pab.2021.6 |
| UF/TRO 9227     | 2 Florida Museum of Natural History            | USA (Florida)        | Early Pliocene | <i>Galeocerdo cuvier</i>       | doi:10.1017/pab.2021.6 |
| EMRG-Chond-J-9  | 38 Vertebrate Collection, University of Vienna | Southeast Asia       | Extant         | <i>Galeocerdo cuvier</i>       | doi:10.1017/pab.2021.6 |
| EMRG-Chond-J-10 | 41 Vertebrate Collection, University of Vienna | Southeast Asia       | Extant         | <i>Galeocerdo cuvier</i>       | doi:10.1017/pab.2021.6 |
| EMRG-Chond-J-16 | 45 Vertebrate Collection, University of Vienna | nd                   | Extant         | <i>Galeocerdo cuvier</i>       | doi:10.1017/pab.2021.6 |
| DGM 653-P       | 1 dos Reis 2005                                | Brasil (Pará)        | Miocene        | <i>Galeocerdo cuvier</i>       | doi:10.1017/pab.2021.6 |
| NA              | 1 Davis 1888                                   | New Zealand          | Middle Miocene | † <i>Galeocerdo davisi</i>     | doi:10.1017/pab.2021.6 |
| NA              | 14 Haimuseum Aathal Switzerland                | Morocco (Ad Dakhla)  | Late Eocene    | † <i>Galeocerdo eaglesomei</i> | doi:10.1017/pab.2021.6 |
| CGM 60025       | 1 Underwood et al. 2011                        | Egypt                | Middle Eocene  | † <i>Galeocerdo eaglesomei</i> | doi:10.1017/pab.2021.6 |
| PAL 13577       | 1 Natural History Museum London                | Nigeria              | Middle Eocene  | † <i>Galeocerdo eaglesomei</i> | doi:10.1017/pab.2021.6 |
| P.13578         | 1 Natural History Museum London                | Nigeria              | Middle Eocene  | † <i>Galeocerdo eaglesomei</i> | doi:10.1017/pab.2021.6 |
| P.13579         | 1 Natural History Museum London                | Nigeria              | Middle Eocene  | † <i>Galeocerdo eaglesomei</i> | doi:10.1017/pab.2021.6 |
| P.13580         | 1 Natural History Museum London                | Nigeria              | Middle Eocene  | † <i>Galeocerdo eaglesomei</i> | doi:10.1017/pab.2021.6 |
| P.13581         | 1 Natural History Museum London                | Nigeria              | Middle Eocene  | † <i>Galeocerdo eaglesomei</i> | doi:10.1017/pab.2021.6 |
| P.13582         | 1 Natural History Museum London                | Nigeria              | Middle Eocene  | † <i>Galeocerdo eaglesomei</i> | doi:10.1017/pab.2021.6 |
| P.13583         | 1 Natural History Museum London                | Nigeria              | Middle Eocene  | † <i>Galeocerdo eaglesomei</i> | doi:10.1017/pab.2021.6 |
| P.13586         | 1 Natural History Museum London                | Nigeria              | Middle Eocene  | † <i>Galeocerdo eaglesomei</i> | doi:10.1017/pab.2021.6 |
| P.13588         | 1 Natural History Museum London                | Nigeria              | Middle Eocene  | † <i>Galeocerdo eaglesomei</i> | doi:10.1017/pab.2021.6 |
| P.13589         | 1 Natural History Museum London                | Nigeria              | Middle Eocene  | † <i>Galeocerdo eaglesomei</i> | doi:10.1017/pab.2021.6 |
| P.13591         | 1 Natural History Museum London                | Nigeria              | Middle Eocene  | † <i>Galeocerdo eaglesomei</i> | doi:10.1017/pab.2021.6 |
| P.13592         | 1 Natural History Museum London                | Nigeria              | Middle Eocene  | † <i>Galeocerdo eaglesomei</i> | doi:10.1017/pab.2021.6 |
| P.13593         | 1 Natural History Museum London                | Nigeria              | Middle Eocene  | † <i>Galeocerdo eaglesomei</i> | doi:10.1017/pab.2021.6 |
| P.73677         | 1 Natural History Museum London                | Morocco (Ad Dakhla)  | Late Eocene    | † <i>Galeocerdo eaglesomei</i> | doi:10.1017/pab.2021.6 |
| L.U. 211        | 1 Tewari et al. 1960                           | India (Gujarat)      | Early Miocene  | † <i>Galeocerdo gajensis</i>   | doi:10.1017/pab.2021.6 |



|                     |    |                                             |                      |                 |                                  |                        |
|---------------------|----|---------------------------------------------|----------------------|-----------------|----------------------------------|------------------------|
| DJ.033              | 1  | Haimuseum Aathal Switzerland                | USA (Texas)          | Eocene          | † <i>Galeocerdo latidens</i>     | doi:10.1017/pab.2021.6 |
| DJ.033              | 3  | Haimuseum Aathal Switzerland                | Great Britain        | Eocene          | † <i>Galeocerdo latidens</i>     | doi:10.1017/pab.2021.6 |
| NA                  | 6  | Haimuseum Aathal Switzerland                | Togo                 | Late Eocene     | † <i>Galeocerdo latidens</i>     | doi:10.1017/pab.2021.6 |
| NA                  | 1  | Haimuseum Aathal Switzerland                | Morocco (Ad Dakhla)  | Late Eocene     | † <i>Galeocerdo latidens</i>     | doi:10.1017/pab.2021.6 |
| NA                  | 3  | Haimuseum Aathal Switzerland                | UK (Sussex)          | Eocene          | † <i>Galeocerdo latidens</i>     | doi:10.1017/pab.2021.6 |
| NA                  | 1  | D. J. Kemp                                  | UK (Hampshire)       | Eocene          | † <i>Galeocerdo latidens</i>     | doi:10.1017/pab.2021.6 |
| NA                  | 2  | D. J. Kemp                                  | UK (Hampshire)       | Eocene          | † <i>Galeocerdo latidens</i>     | doi:10.1017/pab.2021.6 |
| DTK 14-19/9/85      | 2  | D. J. Kemp                                  | UK (Hampshire)       | Eocene          | † <i>Galeocerdo latidens</i>     | doi:10.1017/pab.2021.6 |
| DTK:2000.95.12.1    | 3  | D. J. Kemp                                  | UK (Hampshire)       | Eocene          | † <i>Galeocerdo latidens</i>     | doi:10.1017/pab.2021.6 |
| CGM 60026           | 1  | Underwood et al. 2011                       | Egypt                | Eocene          | † <i>Galeocerdo latidens</i>     | doi:10.1017/pab.2021.6 |
| NA                  | 10 | Haimuseum Aathal Switzerland                | USA (Florida)        | Miocene         | † <i>Galeocerdo mayumbensis</i>  | doi:10.1017/pab.2021.6 |
| UF 232399           | 4  | Florida Museum of Natural History           | USA (Florida)        | Middle Miocene  | † <i>Galeocerdo mayumbensis</i>  | doi:10.1017/pab.2021.6 |
| UF/TRO 6017         | 6  | Florida Museum of Natural History           | USA (Florida)        | Middle Miocene  | † <i>Galeocerdo mayumbensis</i>  | doi:10.1017/pab.2021.6 |
| UF/V 4963           | 1  | Florida Museum of Natural History           | USA (Florida)        | Early Miocene   | † <i>Galeocerdo mayumbensis</i>  | doi:10.1017/pab.2021.6 |
| UF/V 4988           | 1  | Florida Museum of Natural History           | USA (Florida)        | Early Miocene   | † <i>Galeocerdo mayumbensis</i>  | doi:10.1017/pab.2021.6 |
| UF/V 5118           | 1  | Florida Museum of Natural History           | USA (Florida)        | Early Miocene   | † <i>Galeocerdo mayumbensis</i>  | doi:10.1017/pab.2021.6 |
| UF/V 2676           | 1  | Florida Museum of Natural History           | USA (Florida)        | Early Miocene   | † <i>Galeocerdo mayumbensis</i>  | doi:10.1017/pab.2021.6 |
| UF/V 4181           | 2  | Florida Museum of Natural History           | USA (Florida)        | Early Miocene   | † <i>Galeocerdo mayumbensis</i>  | doi:10.1017/pab.2021.6 |
| NRPS-P12007         | 5  | Swedish Museum of Natural History           | New Guinea           | Miocene         | † <i>Galeocerdo mayumbensis</i>  | doi:10.1017/pab.2021.6 |
| N653-PDGM-DNPM      | 1  | da Silva Santos & Travassos 1960            | Brasil (Pará)        | Early Miocene   | † <i>Galeocerdo paulinoi</i>     | doi:10.1017/pab.2021.6 |
| 334960              | 3  | NMNH, Washington, D.C.                      | USA (Maryland)       | Middle Miocene  | † <i>Galeocerdo triqueter</i>    | doi:10.1017/pab.2021.6 |
| DJ.034              | 2  | Haimuseum Aathal Switzerland                | USA (Georgia)        | Eocene          | † <i>Hemipristis curvatus</i>    | doi:10.1017/pab.2021.6 |
| NA                  | 3  | Haimuseum Aathal Switzerland                | Morocco (Ad Dakhla)  | Late Eocene     | † <i>Hemipristis curvatus</i>    | doi:10.1017/pab.2021.6 |
| NA                  | 6  | Haimuseum Aathal Switzerland                | USA (Arkansas)       | Early Pliocene  | † <i>Hemipristis serra</i>       | doi:10.1017/pab.2021.6 |
| 7-298               | 1  | Haimuseum Aathal Switzerland                | USA (California)     | Miocene         | † <i>Hemipristis serra</i>       | doi:10.1017/pab.2021.6 |
| NA                  | 1  | Lerliche 1910                               | France (Paris Basin) | Oligocene early | † <i>Physogaleus acutus</i>      | doi:10.1017/pab.2021.6 |
| PAL366457           | 1  | NMNH, Washington, D.C.                      | USA (Alabama)        | Early Eocene    | † <i>Physogaleus alabamensis</i> | doi:10.1017/pab.2021.6 |
| 5361/15             | 1  | Malyskhina et al. 2013                      | Ukraine (Crimea)     | Middle Eocene   | † <i>Physogaleus alabamensis</i> | doi:10.1017/pab.2021.6 |
| KM EZ-AF GA/Ca7-194 | 1  | Haimuseum Aathal Switzerland                | nd                   | Eocene          | † <i>Physogaleus alabamensis</i> | doi:10.1017/pab.2021.6 |
| EMRG-Chond-T-74     | 21 | Vertebrate Collection, University of Vienna | Morocco (Ad Dakhla)  | Eocene          | † <i>Physogaleus alabamensis</i> | doi:10.1017/pab.2021.6 |
| NA                  | 2  | Haimuseum Aathal Switzerland                | USA (New Jersey)     | Early Miocene   | † <i>Physogaleus contortus</i>   | doi:10.1017/pab.2021.6 |
| EMRG-Chond-T-75     | 26 | Vertebrate Collection, University of Vienna | USA (North Carolina) | Early Miocene   | † <i>Physogaleus contortus</i>   | doi:10.1017/pab.2021.6 |
| P.9083-4            | 2  | Natural History Museum London               | Argentina            | Late Oligocene  | † <i>Physogaleus contortus</i>   | doi:10.1017/pab.2021.6 |
| NA                  | 1  | Florida Museum of Natural History           | USA (Florida)        | Miocene         | † <i>Physogaleus contortus</i>   | doi:10.1017/pab.2021.6 |
| UF 227864           | 1  | Florida Museum of Natural History           | USA (Florida)        | Early Pliocene  | † <i>Physogaleus contortus</i>   | doi:10.1017/pab.2021.6 |
| UF 228424           | 1  | Florida Museum of Natural History           | USA (Florida)        | Middle Miocene  | † <i>Physogaleus contortus</i>   | doi:10.1017/pab.2021.6 |
| UF 231020           | 1  | Florida Museum of Natural History           | USA (Florida)        | Middle Miocene  | † <i>Physogaleus contortus</i>   | doi:10.1017/pab.2021.6 |
| UF 231225           | 3  | Florida Museum of Natural History           | USA (Florida)        | Middle Miocene  | † <i>Physogaleus contortus</i>   | doi:10.1017/pab.2021.6 |
| UF 240509           | 1  | Florida Museum of Natural History           | USA (Florida)        | Late Miocene    | † <i>Physogaleus contortus</i>   | doi:10.1017/pab.2021.6 |
| UF 28779            | 7  | Florida Museum of Natural History           | USA (Florida)        | Middle Miocene  | † <i>Physogaleus contortus</i>   | doi:10.1017/pab.2021.6 |
| UF/V 9977           | 1  | Florida Museum of Natural History           | USA (Florida)        | Early Miocene   | † <i>Physogaleus contortus</i>   | doi:10.1017/pab.2021.6 |
| UF/TRO 11514        | 1  | Florida Museum of Natural History           | USA (Florida)        | Middle Miocene  | † <i>Physogaleus contortus</i>   | doi:10.1017/pab.2021.6 |
| UF/TRO 14490        | 1  | Florida Museum of Natural History           | USA (Florida)        | Middle Miocene  | † <i>Physogaleus contortus</i>   | doi:10.1017/pab.2021.6 |
| UF/TRO 14631        | 3  | Florida Museum of Natural History           | USA (Florida)        | Middle Miocene  | † <i>Physogaleus contortus</i>   | doi:10.1017/pab.2021.6 |
| UF/TRO 15103        | 2  | Florida Museum of Natural History           | USA (Florida)        | Middle Miocene  | † <i>Physogaleus contortus</i>   | doi:10.1017/pab.2021.6 |
| UF/TRO 15236        | 1  | Florida Museum of Natural History           | USA (Florida)        | Late Miocene    | † <i>Physogaleus contortus</i>   | doi:10.1017/pab.2021.6 |
| UF/TRO 15241        | 1  | Florida Museum of Natural History           | USA (Florida)        | Middle Miocene  | † <i>Physogaleus contortus</i>   | doi:10.1017/pab.2021.6 |
| UF/TRO 15442        | 5  | Florida Museum of Natural History           | USA (Florida)        | Middle Miocene  | † <i>Physogaleus contortus</i>   | doi:10.1017/pab.2021.6 |
| UF/TRO 9881         | 2  | Florida Museum of Natural History           | USA (Florida)        | Middle Miocene  | † <i>Physogaleus contortus</i>   | doi:10.1017/pab.2021.6 |

**Table S6.** Linear Discriminant Analysis of shark teeth, related to Figure 9.

a) LDA Shark genera (6 PCs)  
 Genera Confusion Matrix

|                     | <i>Carcharhinus</i> | <i>Galeocerdo</i> | <i>Hemipristis</i> | <i>Physogaleus</i> |
|---------------------|---------------------|-------------------|--------------------|--------------------|
| <i>Carcharhinus</i> | 0.571428571         | 0                 | 0.224489796        | 0                  |
| <i>Galeocerdo</i>   | 0                   | 76.58843537       | 0.044217687        | 6.741496599        |
| <i>Hemipristis</i>  | 0.108843537         | 0.360544218       | 0.880952381        | 0.197278912        |
| <i>Physogaleus</i>  | 0                   | 1.962585034       | 0.891156463        | 11.42857143        |
| Accuracy            | 0.89                |                   |                    |                    |
| Cohen's Kappa       | 0.6652854           |                   |                    |                    |

Gorongosa fossil predictions (posterior probabilities)

|                           | <i>Carcharhinus</i> | <i>Galeocerdo</i> | <i>Hemipristis</i> | <i>Physogaleus</i> |
|---------------------------|---------------------|-------------------|--------------------|--------------------|
| Gorongosa_A_PPG2019-P-129 | 0.00%               | 97.53%            | 0.02%              | 2.45%              |
| Gorongosa_B_PPG2019-P-127 | 0.00%               | 96.04%            | 1.81%              | 2.16%              |

b) LDA using *Galeocerdo* & *Physogaleus* genera (4 PCs)  
*Galeocerdo* & *Physogaleus* Confusion Matrix

|                                | <i>Galeocerdo aduncus</i> | <i>Galeocerdo capellini</i> | <i>Galeocerdo clarkensis</i> | <i>Galeocerdo cuvier</i> | <i>Galeocerdo eaglesomei</i> | <i>Galeocerdo mayumbensis</i> | <i>Physogaleus alabamensis</i> | <i>Physogaleus contortus</i> |
|--------------------------------|---------------------------|-----------------------------|------------------------------|--------------------------|------------------------------|-------------------------------|--------------------------------|------------------------------|
| <i>Galeocerdo aduncus</i>      | 11.03759398               | 0.285714286                 | 1.255639098                  | 3.597744361              | 0.045112782                  | 0                             | 1.436090226                    | 0.996240602                  |
| <i>Galeocerdo capellini</i>    | 0                         | 0.116541353                 | 0                            | 0.165413534              | 0.007518797                  | 0                             | 0.011278195                    | 0                            |
| <i>Galeocerdo clarkensis</i>   | 0.206766917               | 0.007518797                 | 0.078947368                  | 0.063909774              | 0.105263158                  | 0                             | 0.15037594                     | 0                            |
| <i>Galeocerdo cuvier</i>       | 6.469924812               | 3.763157895                 | 0.578947368                  | 34.27067669              | 0.545112782                  | 0.80075188                    | 0.639097744                    | 0.296992481                  |
| <i>Galeocerdo eaglesomei</i>   | 0.308270677               | 0.109022556                 | 0.218045113                  | 0.815789474              | 4.07518797                   | 0.387218045                   | 0.684210526                    | 0                            |
| <i>Galeocerdo mayumbensis</i>  | 0                         | 0.229323308                 | 0.304511278                  | 0.289473684              | 0.184210526                  | 4.827067669                   | 0                              | 0                            |
| <i>Physogaleus alabamensis</i> | 1.015037594               | 0                           | 1.72556391                   | 0.646616541              | 0.30075188                   | 0                             | 3.721804511                    | 0.236842105                  |
| <i>Physogaleus contortus</i>   | 0.511278195               | 0                           | 0.34962406                   | 0                        | 0                            | 0                             | 0.12406015                     | 12.0037594                   |
| Accuracy                       | 0.7022556                 |                             |                              |                          |                              |                               |                                |                              |
| Cohen's Kappa                  | 0.5994338                 |                             |                              |                          |                              |                               |                                |                              |

Gorongosa fossil predictions (posterior probabilities)

|                           | <i>Galeocerdo aduncus</i> | <i>Galeocerdo capellini</i> | <i>Galeocerdo clarkensis</i> | <i>Galeocerdo cuvier</i> | <i>Galeocerdo eaglesomei</i> | <i>Galeocerdo mayumbensis</i> | <i>Physogaleus alabamensis</i> | <i>Physogaleus contortus</i> |
|---------------------------|---------------------------|-----------------------------|------------------------------|--------------------------|------------------------------|-------------------------------|--------------------------------|------------------------------|
| Gorongosa_A_PPG2019-P-129 | 12.36%                    | 16.61%                      | 11.22%                       | 27.80%                   | 13.72%                       | 12.54%                        | 5.75%                          | 0.00%                        |
| Gorongosa_B_PPG2019-P-127 | 35.43%                    | 1.01%                       | 28.05%                       | 8.16%                    | 6.62%                        | 0.19%                         | 20.42%                         | 0.12%                        |

c) LDA using *Galeocerdo* species (4 PCs)  
*Galeocerdo* species confusion Matrix

|                               | <i>Galeocerdo aduncus</i> | <i>Galeocerdo capellini</i> | <i>Galeocerdo clarkensis</i> | <i>Galeocerdo cuvier</i> | <i>Galeocerdo eaglesomei</i> | <i>Galeocerdo mayumbensis</i> |
|-------------------------------|---------------------------|-----------------------------|------------------------------|--------------------------|------------------------------|-------------------------------|
| <i>Galeocerdo aduncus</i>     | 17.06132075               | 0.429245283                 | 3.382075472                  | 3.844339623              | 0.023584906                  | 0                             |
| <i>Galeocerdo capellini</i>   | 0                         | 0.367924528                 | 0.051886792                  | 0.731132075              | 0.04245283                   | 0                             |
| <i>Galeocerdo clarkensis</i>  | 0.273584906               | 0.018867925                 | 0.54245283                   | 0.113207547              | 0.533018868                  | 0                             |
| <i>Galeocerdo cuvier</i>      | 6.806603774               | 4.443396226                 | 0.981132075                  | 44.33962264              | 0.768867925                  | 1                             |
| <i>Galeocerdo eaglesomei</i>  | 0.386792453               | 0.113207547                 | 0.235849057                  | 0.716981132              | 4.985849057                  | 0.872641509                   |
| <i>Galeocerdo mayumbensis</i> | 0                         | 0.287735849                 | 0.466981132                  | 0.254716981              | 0.25                         | 5.674528302                   |
| Accuracy                      | 0.729717                  |                             |                              |                          |                              |                               |
| Cohen's Kappa                 | 0.5749247                 |                             |                              |                          |                              |                               |

Gorongosa fossil predictions (posterior probabilities)

|                           | <i>Galeocerdo aduncus</i> | <i>Galeocerdo capellini</i> | <i>Galeocerdo clarkensis</i> | <i>Galeocerdo cuvier</i> | <i>Galeocerdo eaglesomei</i> | <i>Galeocerdo mayumbensis</i> |
|---------------------------|---------------------------|-----------------------------|------------------------------|--------------------------|------------------------------|-------------------------------|
| Gorongosa_A_PPG2019-P-129 | 9.43%                     | 12.75%                      | 11.14%                       | 31.04%                   | 18.08%                       | 17.54%                        |
| Gorongosa_B_PPG2019-P-127 | 47.18%                    | 0.11%                       | 37.04%                       | 2.52%                    | 13.09%                       | 0.07%                         |

Confusion matrix entries are average cell counts across the 200 resamples

**Table S7.** List of fossil hyracoid mandibular specimens used in comparative sample, related to Figure 12.

| <b>Specimen</b> | <b>Museum</b>                                 | <b>Online repository</b> | <b>Genus</b>        | <b>Species</b>                 | <b>doi/ark</b>         |
|-----------------|-----------------------------------------------|--------------------------|---------------------|--------------------------------|------------------------|
| KA1-1190        | Ditsong National Museum of Natural History    | Morphosource             | <i>Procavia</i>     | <i>Procavia transvaalensis</i> | doi:10.17602/M2/M5459  |
| G7052           | Ditsong National Museum of Natural History    | Morphosource             | <i>Procavia</i>     | <i>Procavia</i> sp.            | doi:10.17602/M2/M5470  |
| H.5281.B        | University Museum of Zoology, Cambridge       | Morphosource             | <i>Dendrohyrax</i>  | <i>Dendrohyrax arboreus</i>    | doi:10.17602/M2/M48250 |
| RU18568         | National Museums of Kenya                     |                          | <i>Afrohyrax</i>    | <i>Afrohyrax</i> sp.           |                        |
| ZP349           | National Museums of Kenya                     |                          | <i>Afrohyrax</i>    | <i>Afrohyrax championi</i>     |                        |
| RU15198(A)      | National Museums of Kenya                     |                          | <i>Afrohyrax</i>    | <i>Afrohyrax championi</i>     |                        |
| DPC2150         | Duke Lemur Center Division of Fossil Primates | Morphosource             | <i>Saghatherium</i> | <i>Saghatherium humarum</i>    | ark:/87602/m4/M103969  |
| DPC18145        | Duke Lemur Center Division of Fossil Primates | Morphosource             | <i>Saghatherium</i> | <i>Saghatherium bowni</i>      | ark:/87602/m4/M31737   |
| DPC17675        | Duke Lemur Center Division of Fossil Primates | Morphosource             | <i>Thyrohyrax</i>   | <i>Thyrohyrax meyeri</i>       | ark:/87602/m4/M81579   |
| DPC13282        | Duke Lemur Center Division of Fossil Primates | Morphosource             | <i>Saghatherium</i> | <i>Saghatherium bowni</i>      | ark:/87602/m4/M83288   |
| DPC2763         | Duke Lemur Center Division of Fossil Primates | Morphosource             | <i>Thyrohyrax</i>   | <i>Thyrohyrax domorictus</i>   | ark:/87602/m4/M103971  |
| DPC15384        | Duke Lemur Center Division of Fossil Primates | Morphosource             | <i>Saghatherium</i> | <i>Saghatherium bowni</i>      |                        |
| DPC5283         | Duke Lemur Center Division of Fossil Primates | Morphosource             | <i>Megalohyrax</i>  | <i>Megalohyrax eocaenus</i>    | ark:/87602/m4/M104021  |
| DPC12048        | Duke Lemur Center Division of Fossil Primates | Morphosource             | <i>Saghatherium</i> | <i>Saghatherium bowni</i>      | ark:/87602/m4/M81573   |

**Table S8.** List of fossil hyracoid lower third molars used in comparative sample, related to Figure 13.

| Specimen    | Museum                                     | Online       | Taxon                                   | doi/ark notes          |
|-------------|--------------------------------------------|--------------|-----------------------------------------|------------------------|
| ZP1508      | NMK                                        |              | <i>Bunohyrax</i> aff. <i>fajumensis</i> | cast                   |
| RU15198(A)  | NMK                                        |              | <i>Afrohyrax championi</i>              |                        |
| DPC7369     | Duke Lemur Center                          | Morphosource | <i>Thyrohyrax domoricus</i>             | ark:/87602/m4/M104159  |
| RU18568     | NMK                                        |              | <i>Afrohyrax</i> sp.                    |                        |
| ZP349       | NMK                                        |              | <i>Afrohyrax championi</i>              | cast                   |
| ZP347       | NMK                                        |              | <i>Afrohyrax championi</i>              | cast                   |
| ZP1211      | NMK                                        |              | <i>Thyrohyrax domoricus</i>             | cast                   |
| WK18206(A)  | NMK                                        |              | <i>Afrohyrax championi</i>              |                        |
| DPC2763     | Duke Lemur Center                          | Morphosource | <i>Thyrohyrax domoricus</i>             | ark:/87602/m4/M103971  |
| DPC18145    | Duke Lemur Center                          | Morphosource | <i>Sagatherium boweni</i>               | ark:/87602/m4/M31737   |
| DPC2150     | Duke Lemur Center                          | Morphosource | <i>Sagatherium humarum</i>              | ark:/87602/m4/M103969  |
| DPC5283     | Duke Lemur Center                          | Morphosource | <i>Megalohyrax eocaenus</i>             | ark:/87602/m4/M104021  |
| DPC12048    | Duke Lemur Center                          | Morphosource | <i>Sagatherium boweni</i>               | ark:/87602/m4/M81573   |
| NW22558 (C) | NMK                                        |              | <i>Meroehyrax kyongoi</i>               |                        |
| DPC17675    | Duke Lemur Center                          | Morphosource | <i>Thyrohyrax meyeri</i>                | ark:/87602/m4/M81579   |
| DPC15384    | Duke Lemur Center                          | Morphosource | <i>Sagatherium boweni</i>               |                        |
| DPC13282    | Duke Lemur Center                          | Morphosource | <i>Sagatherium boweni</i>               | ark:/87602/m4/M83288   |
| ZP1255      | NMK                                        |              | <i>Parapliohyrax mirabilis</i>          | cast                   |
| BN802 (H)   | NMK                                        |              | <i>Parapliohyrax ngororaensis</i>       |                        |
| LP22529     | NMK                                        |              | <i>Thyrohyrax microdon</i>              |                        |
| KA1–1190    | Ditsong NMNH                               | Morphosource | <i>Procavia transvaalensis</i>          | doi:10.17602/M2/M5459  |
| G7052       | Ditsong NMNH                               | Morphosource | <i>Procavia</i> sp.                     | doi:10.17602/M2/M5470  |
| NK41304     | NMK                                        |              | <i>Dendrohyrax</i> cf. <i>validus</i>   |                        |
| NK36934     | NMK                                        |              | <i>Dendrohyrax</i> cf. <i>validus</i>   |                        |
| H.5281.B    | University Museum of<br>Zoology, Cambridge | Morphosource | <i>Dendrohyrax arboreus</i>             | doi:10.17602/M2/M48250 |

**Table S9.** Divergence time estimates and posterior support for the hyracoid phylogeny, related to Figure 14.

| Node Number | Minimum bound for the Age 95% highest posterior density interval (HPD) [Ma] | Maximum bounds for the Age 95% highest posterior density interval (HPD) [Ma] | Mean divergence time [Ma] | Posterior support |
|-------------|-----------------------------------------------------------------------------|------------------------------------------------------------------------------|---------------------------|-------------------|
| 1           | 12                                                                          | 23                                                                           | 17.5                      | 0.4               |
| 2           | 16                                                                          | 26.6                                                                         | 21.3                      | 0.72              |
| 3           | 28.1                                                                        | 32.1                                                                         | 30.1                      | 0.74              |
| 4           | 33.9                                                                        | 36.1                                                                         | 35                        | 0.68              |
| 5           | 34.1                                                                        | 38.4                                                                         | 36.3                      | 0.74              |
| 6           | 35.1                                                                        | 41                                                                           | 38                        | 0.29              |
| 7           | 33.9                                                                        | 35.8                                                                         | 34.9                      | 0.9               |
| 8           | 34.1                                                                        | 37                                                                           | 35.5                      | 0.65              |
| 9           | 33.9                                                                        | 35.7                                                                         | 34.8                      | 0.98              |
| 10          | 34.7                                                                        | 38.7                                                                         | 36.7                      | 0.98              |
| 11          | 33.9                                                                        | 37.4                                                                         | 35.7                      | 0.92              |
| 12          | 35.6                                                                        | 40.9                                                                         | 38.3                      | 0.82              |
| 13          | 28.2                                                                        | 34.7                                                                         | 31.4                      | 0.4               |
| 14          | 33.9                                                                        | 36.7                                                                         | 35.3                      | 0.42              |
| 15          | 33.9                                                                        | 35.5                                                                         | 34.7                      | 0.99              |
| 16          | 34.4                                                                        | 38.7                                                                         | 36.5                      | 0.81              |
| 17          | 36.3                                                                        | 42.2                                                                         | 39.3                      | 0.25              |
| 18          | 37                                                                          | 43.6                                                                         | 40.3                      | 0.21              |
| 19          | 33.9                                                                        | 36                                                                           | 35                        | 0.68              |
| 20          | 34                                                                          | 38                                                                           | 36                        | 1                 |
| 21          | 37.7                                                                        | 45                                                                           | 41.4                      | 1                 |
| 22          | 39.4                                                                        | 47.6                                                                         | 43.5                      | 0.49              |
| 23          | 41.8                                                                        | 49.9                                                                         | 45.8                      | 1                 |
| 24          | 47.8                                                                        | 54.8                                                                         | 51.3                      | 0.92              |
| 25          | 56                                                                          | 59.6                                                                         | 57.8                      | 1                 |

## Supplemental References

[1] Cappetta, H. (1970). Les Sélaciens du Miocène de la région de Montpellier. *Palaeovertebrata Mémoire extraordinaire*, 1-139.
